# Supplementary material for: Microbial community characterization of shrimp survivors to AHPND challenge test treated with an effective shrimp probiotic (Vibrio diabolicus)
Source: PubMed Central journal article supplement (PMC8042889; doi:10.1186/s40168-021-01043-8), 2021-04-12

A

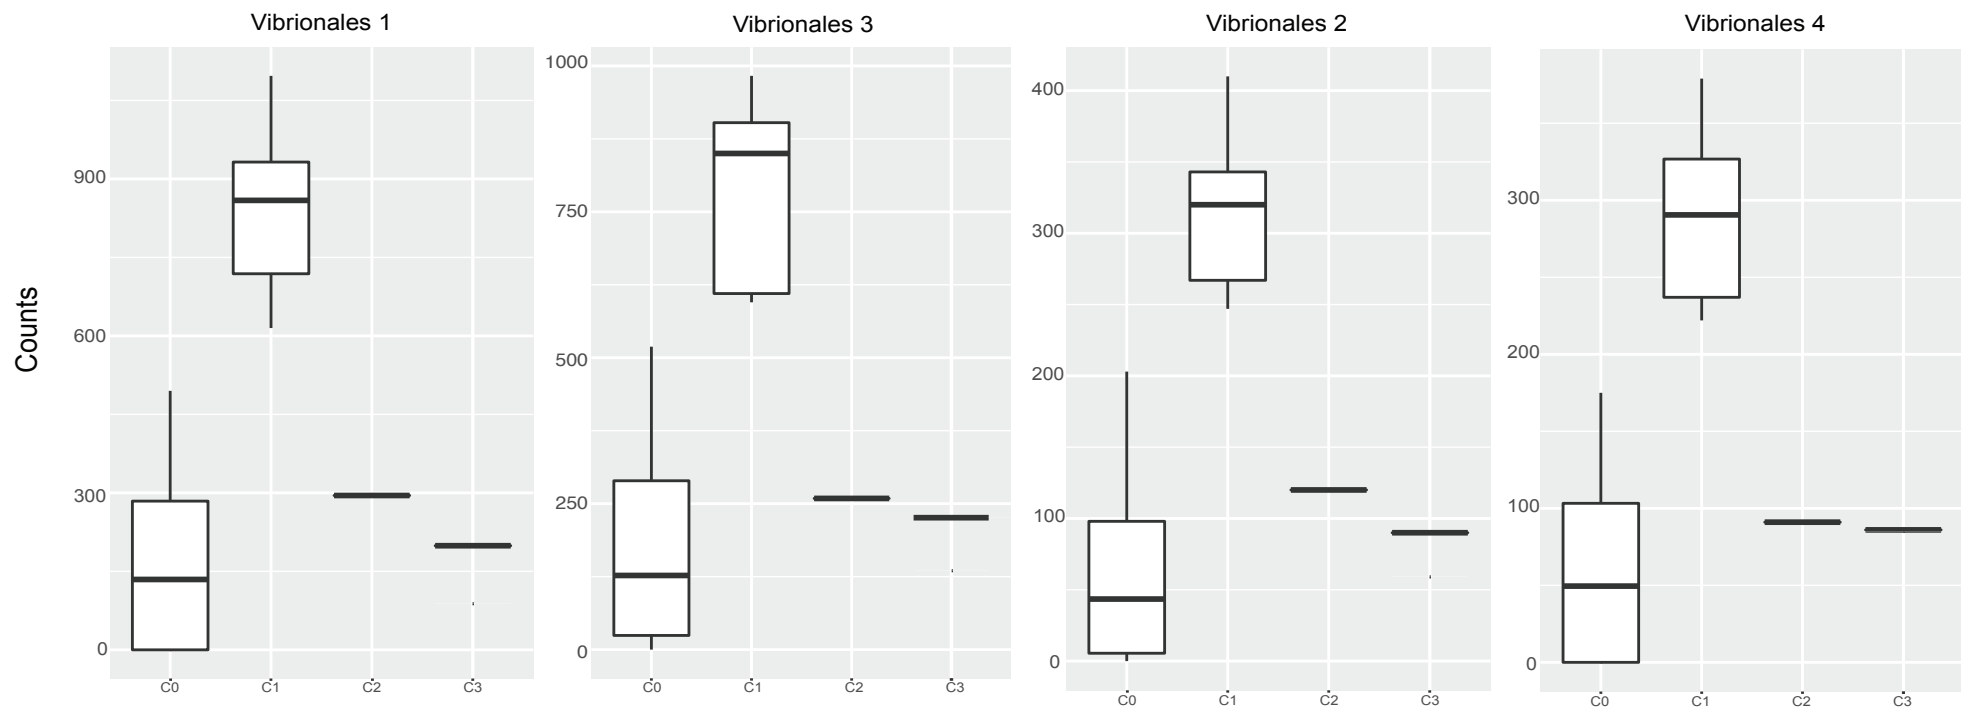

B

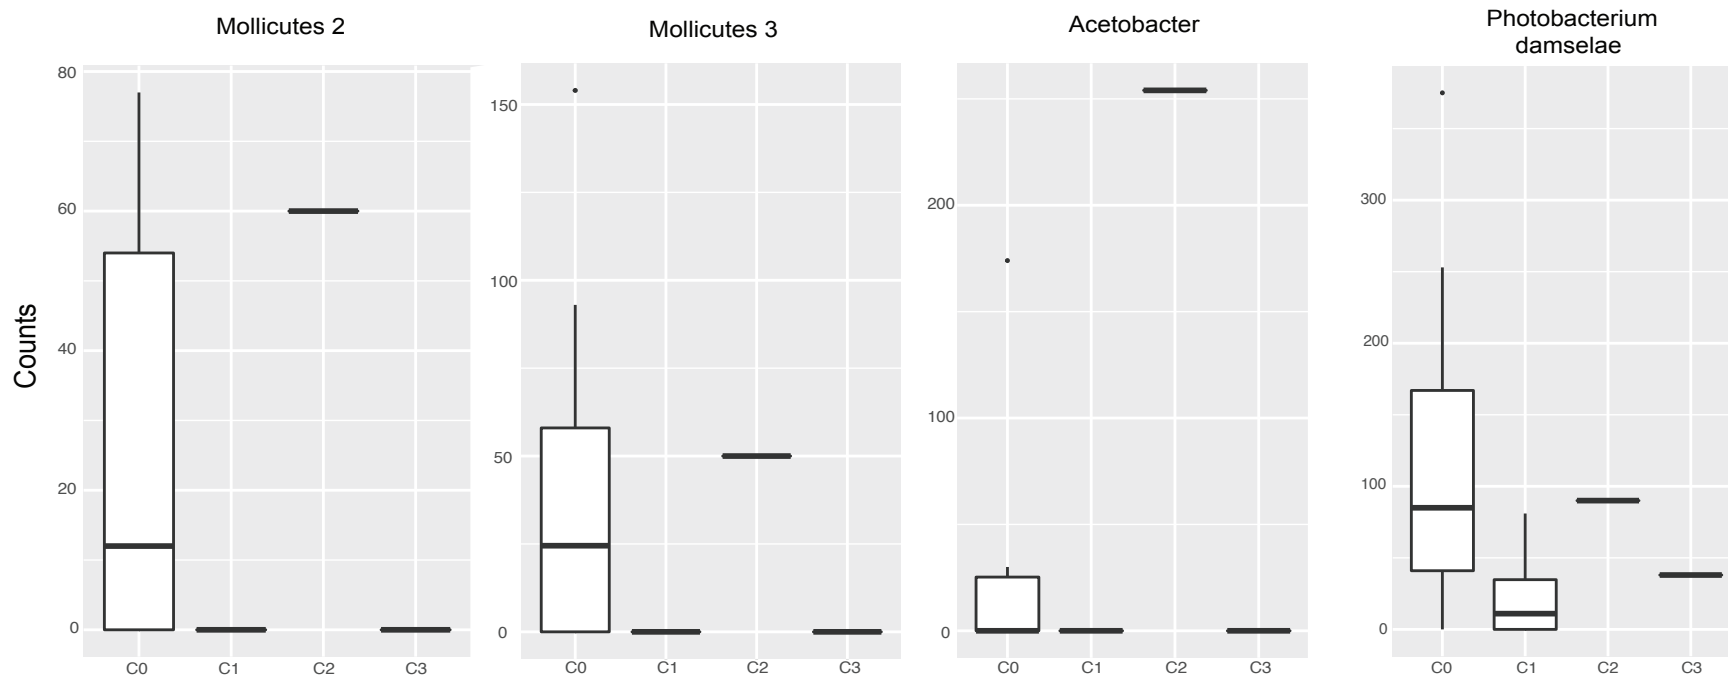

Supplement: 40168_2021_1043_MOESM4_ESM.pdf [file 40168_2021_1043_MOESM4_ESM.pdf]
